# Supplementary material for: LncRNA TSIX acts as a ceRNA of miR-342-3p to Promote the Progression of Nasopharyngeal Carcinoma by Regulating AGR2
Source: Research Square preprint supplement (doi:10.21203/rs.3.rs-58760/v1), 2020-12-21

**Supplementary Figure 1** The multiple supporting fields of cells for Figure 2D.


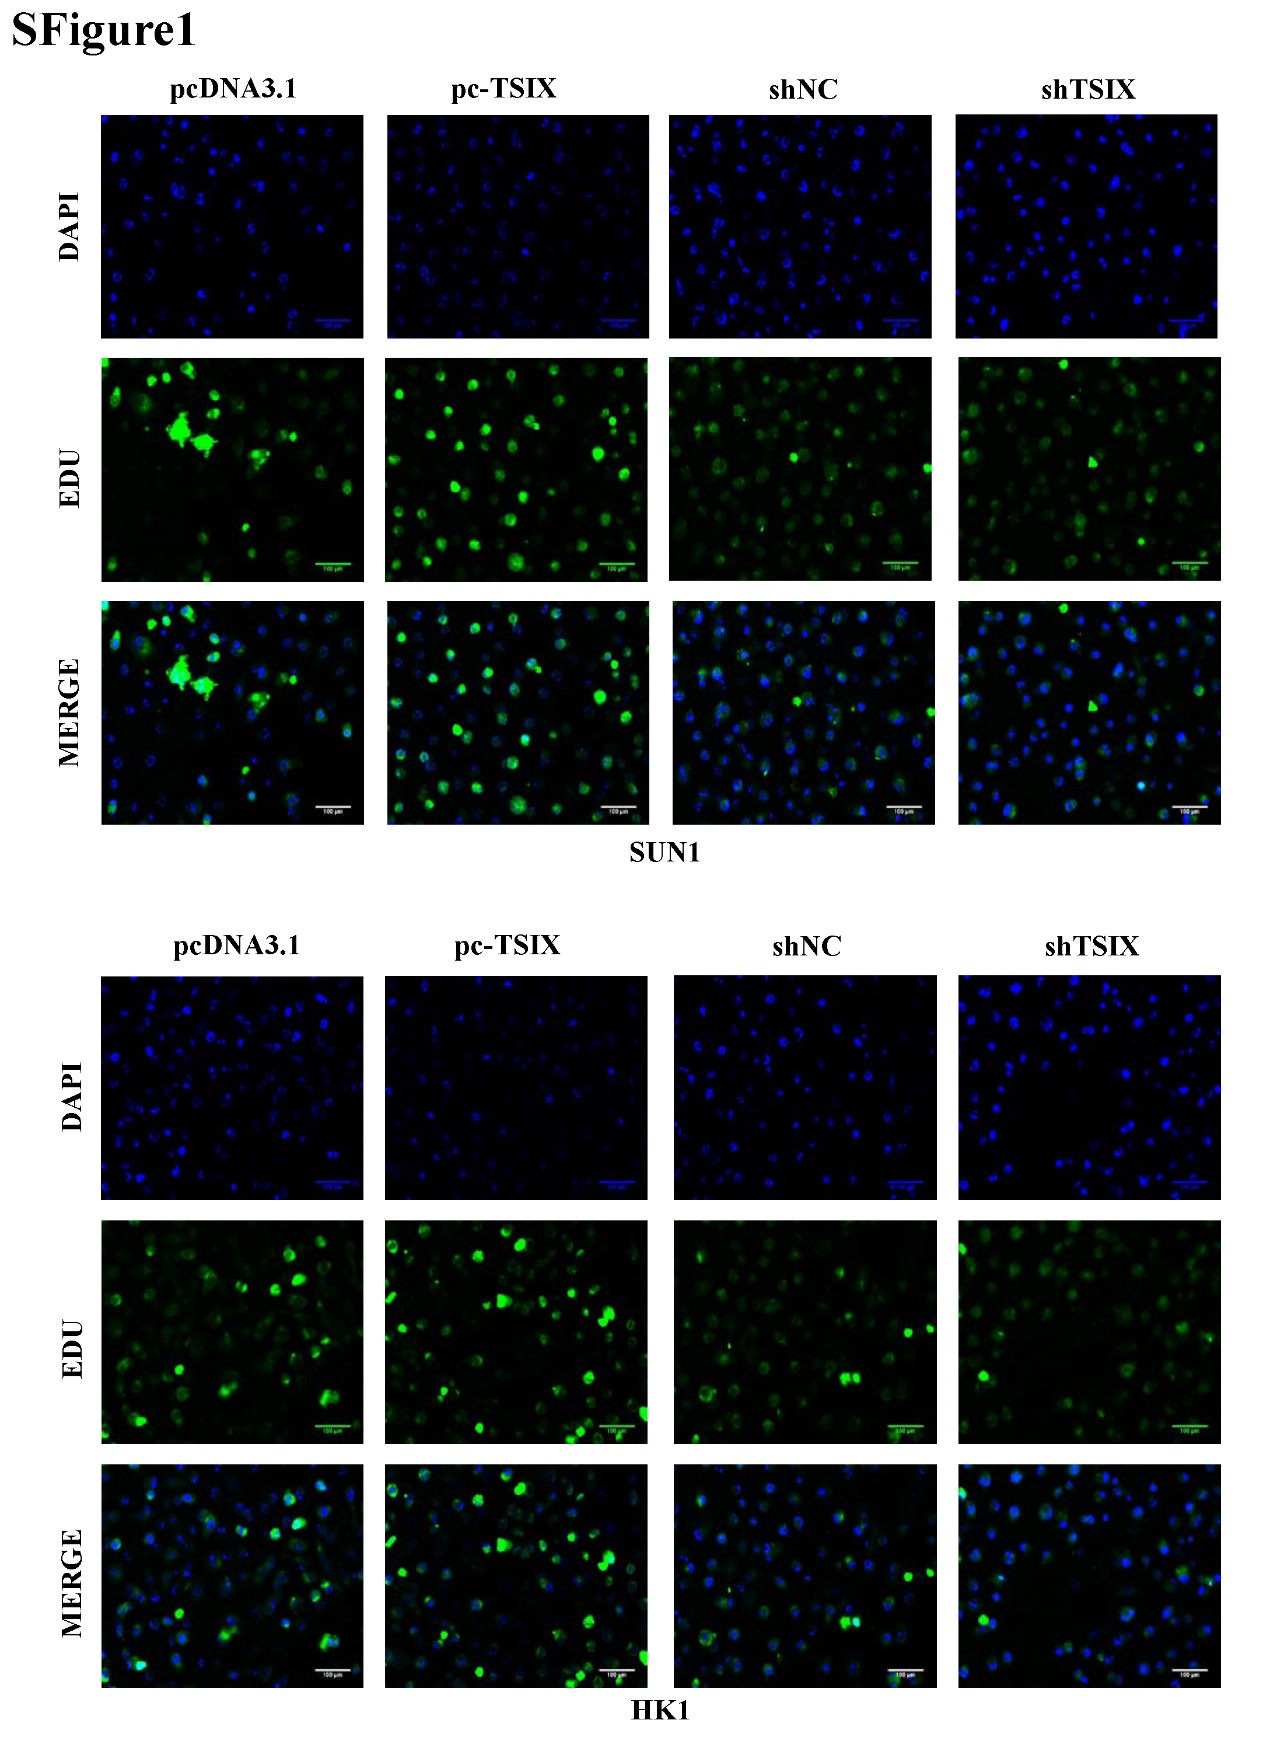


**Supplementary Figure 2** The multiple supporting fields of cells for Figure 4D.


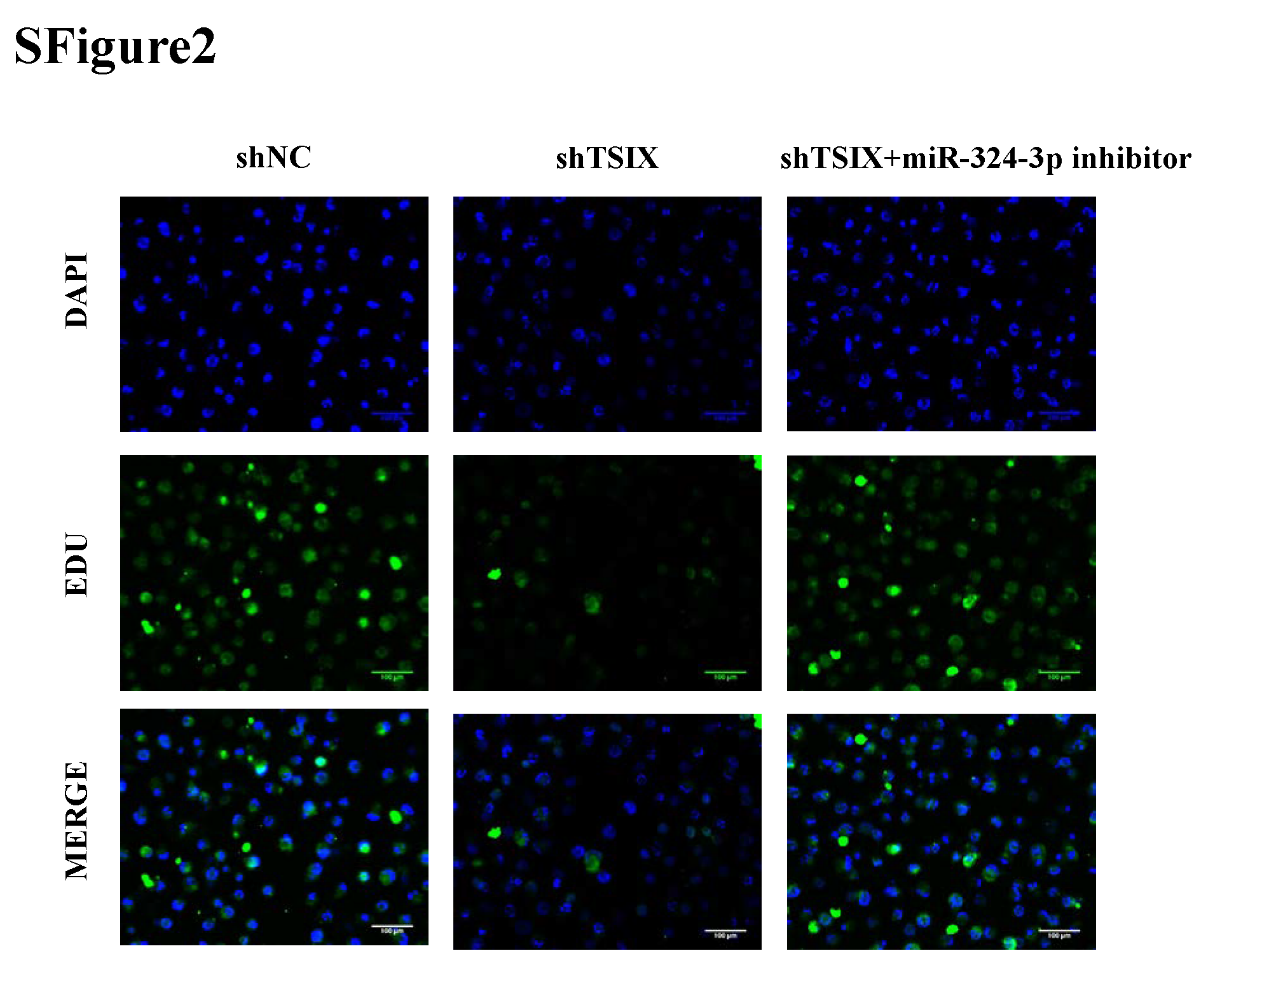


**Supplementary Figure 3** The original western blot of Figure 5C.


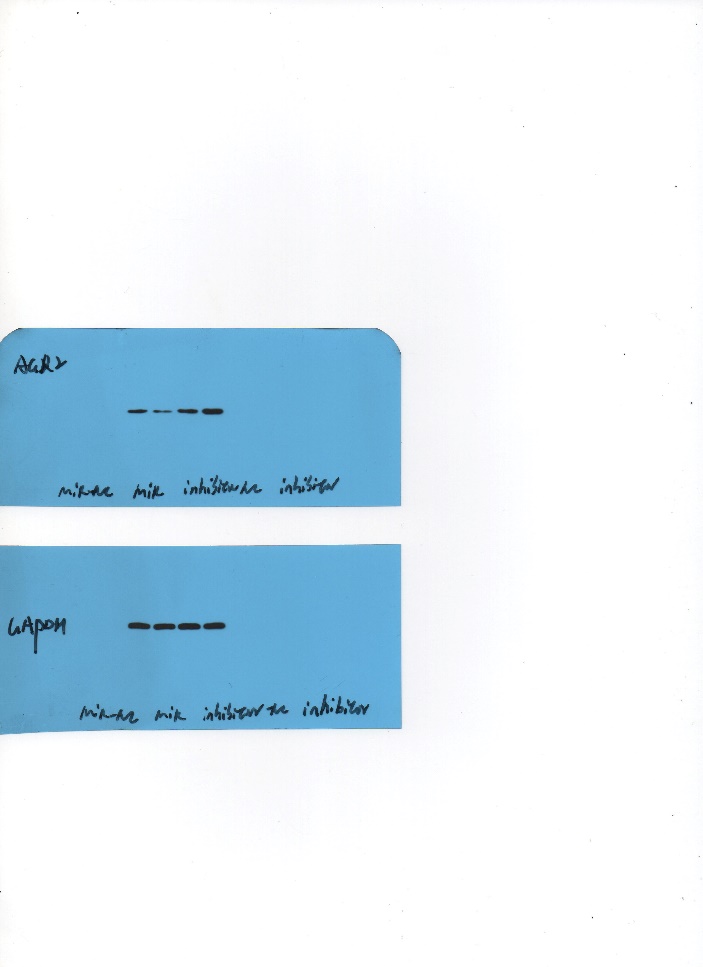


**Supplementary Figure 4** The original western blot of Figure 5D.


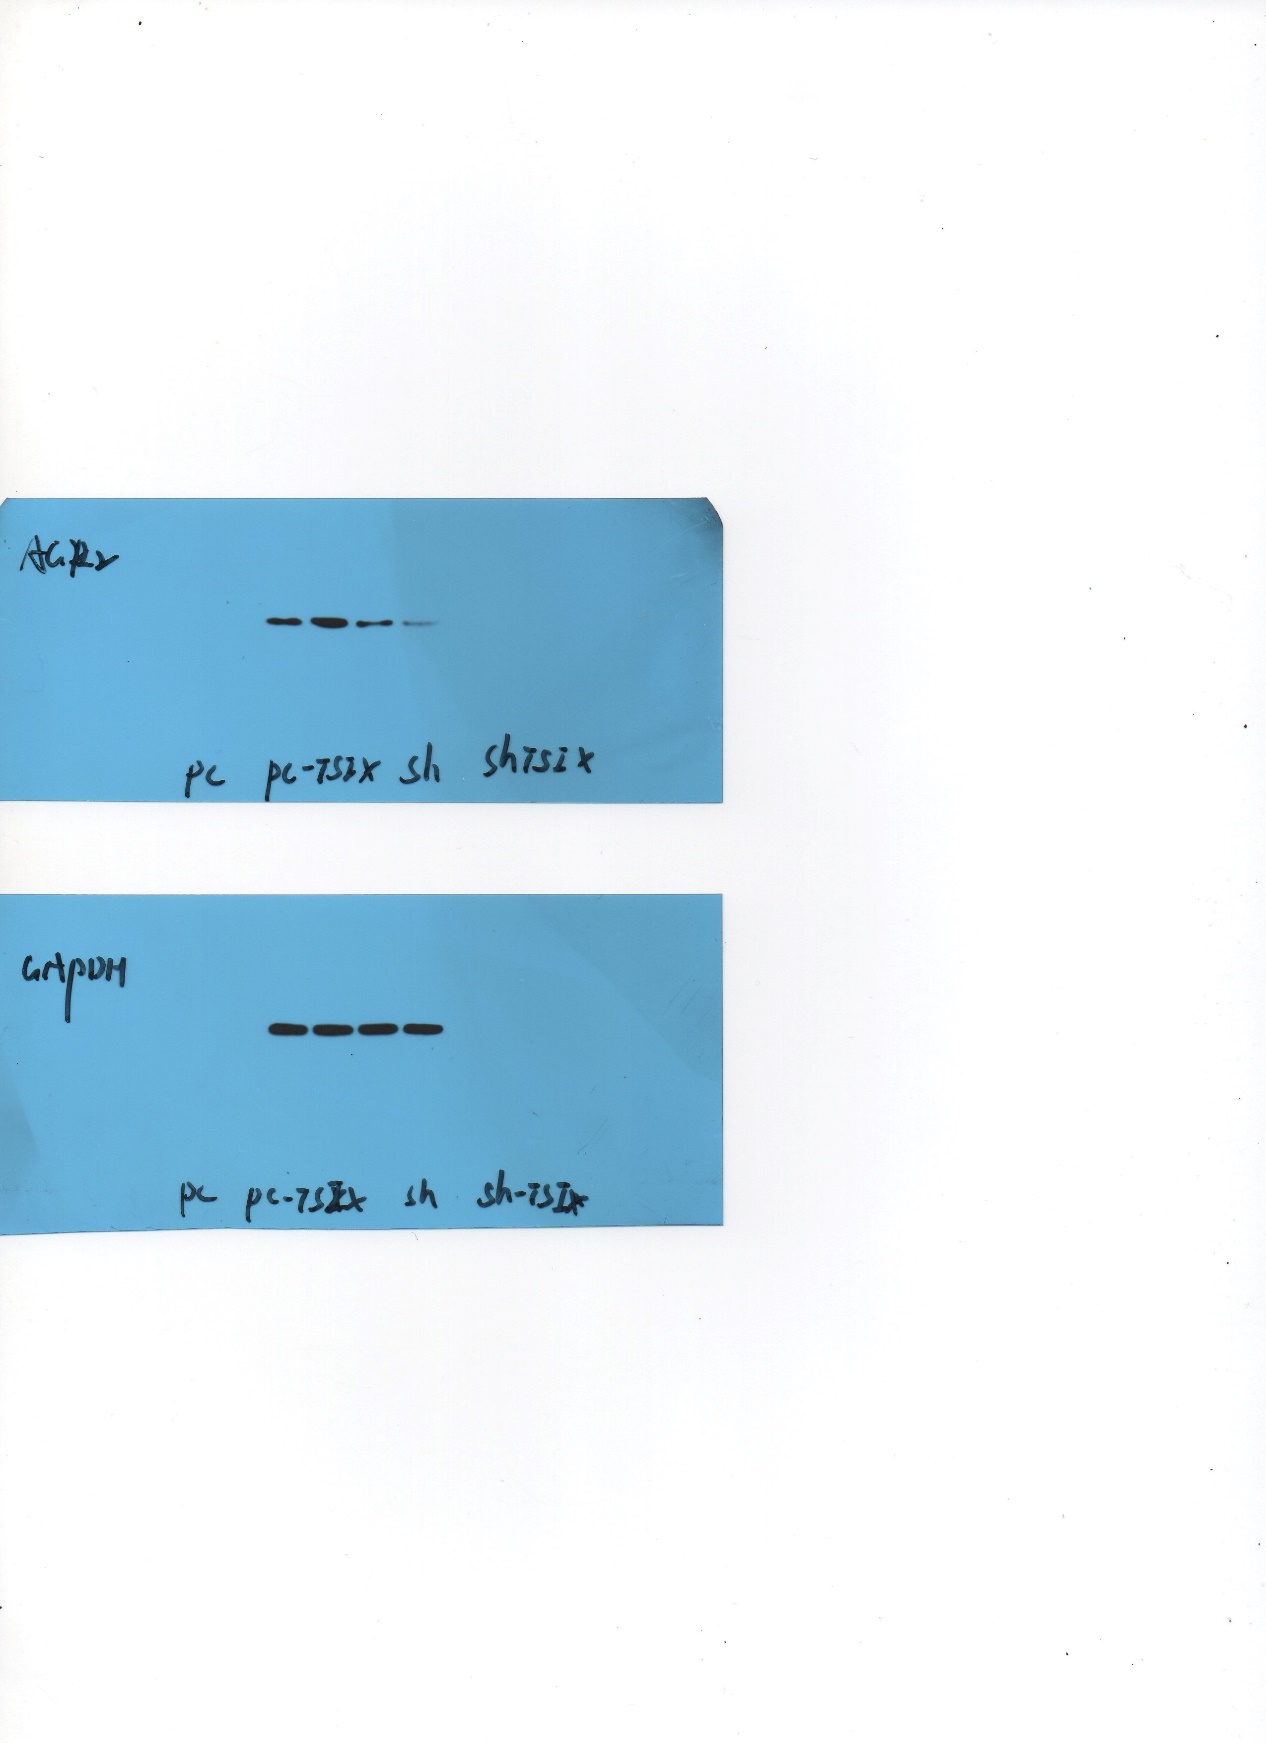


**Supplementary Figure 5** The original western blot of Figure 6E.


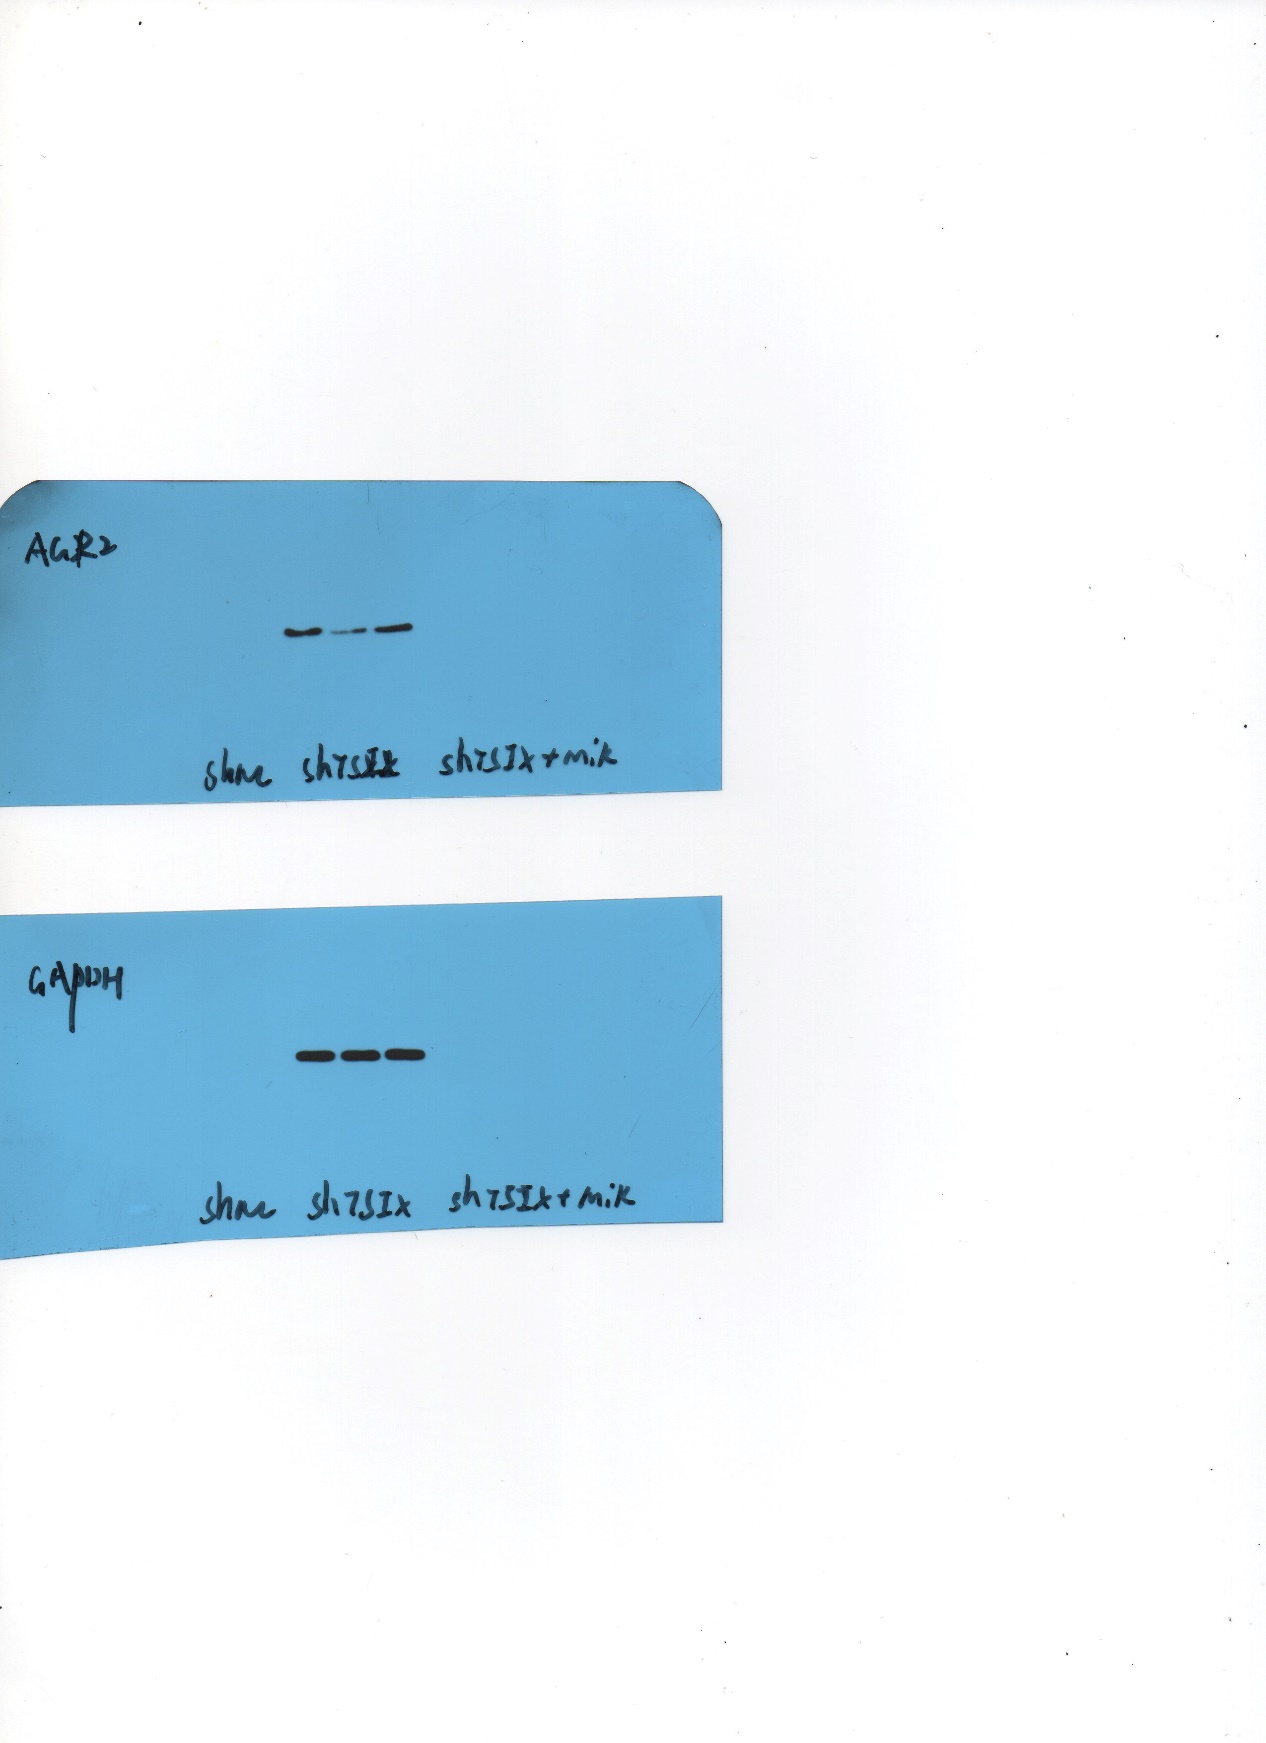

Supplement: Supplementary file 1 [file a06cd129ec055e5963b37dfe.docx]
